# Supplementary material for: Antipyretic Therapy in Critically Ill Septic Patients: A Systematic Review and Meta-Analysis
Source: PubMed Central journal article supplement — Crit Care Med. 2017 Apr 14;45(5):806–13. doi: 10.1097/CCM.0000000000002285 (PMC5389594; doi:10.1097/ccm.0000000000002285), 2017-04-14
Supplement: ccm-45-806-s003.pdf [file ccm-45-806-s003.pdf]

## Search Strategy

### Prepared by:

Susan A. Fowler, MLIS and Angela Hardi, MLS  
Bernard Becker Medical Library  
Washington University in St. Louis

### Appendix

#### Ovid Medline

Date Searched: 2/24/2016

Number of Results: 157, 148 after limiting to English

(exp Adult/ or (adult\* or geriatric\* or elder or nonagenarian\* or octogenarian\* or centenarian\* or senium\* or middle age\*).mp. or ((old\* or senior\*) adj1 (citizen\* or patient\* or Person\* or woman or man or women or men)).mp.) AND (exp Fever/ OR fever\* OR hyperthermia\* OR pyrexia\* OR febrile OR sweating sickness.mp. OR temperature.mp.) AND (exp Sepsis/ or (sepsis or septic\* or urosepsis or py?emia\* or pyohemia\* or bacteremia\* or bacillaemia or bacillemia or bacteraemia or bacteriemia or endotoxemia\* or Fungemia\* or fungaemia\* or candidemia\* or candidaemia\* or Parasitemia\* or Viremia\* or Fusobacterium necrophorum infection or necrobacillosis or meningococemia or meningococcaemia or toxic forward failure OR critically ill).mp. or (blood adj2 poison\*).mp. or ((Toxic or Endotoxic) adj2 (Shock\*)).mp. or ((Lemierre\*) adj1 (disease or syndrome)).mp.) AND (exp Antipyretics/ OR exp Acetaminophen/ OR exp Ibuprofen/ OR exp Aspirin/ OR exp Ketoprofen/ OR exp Naproxen/ OR exp Hypothermia, Induced/ or exp Cryotherapy/ OR (antipyretic\* OR antifebrile\* OR acetaminophen OR nimesulide OR aldoron OR aulin OR nimed OR nisulid OR halprin OR ibofen OR ibuprofen OR ibuprofene OR medicol OR medipren OR mediprin OR midol OR motrin OR neobrufen OR nerofen OR neutropain OR noritis OR anaprox OR anexopen OR apranax OR apraxin OR apranax OR naproxen OR naproxi OR naproxyn OR naprozyne OR naprux OR napxen OR narma OR narocin OR narox OR naxen OR naxopren OR naxyn OR neprossin OR norswel OR novonaprox OR novuran OR nuprafem OR nycopren OR pactens OR prexan OR priaxen OR primeral OR prodilor OR pronaxen OR proxen OR proxidol OR rahsen OR rs3540 OR rs3650 OR sanomed OR saritilron OR seladin OR ketoprofen OR kaltrofen OR keprofen OR acetophen OR acetosal OR acetosalicylic acid OR acetosalin OR acetosalum OR acetyl salicylate OR acetyl salicylic acid OR acetylic salicylic acid OR acetylo salicylic acid OR actorin OR acylpyrin OR acylpyrine OR acytosal OR alasil OR albyl-e OR alka seltzer OR alkaspirin OR anasprin OR andol OR anopyrin OR ansin OR anthrom OR aptor OR arthralgyl OR asaflow OR asaphen OR asapor OR asatard OR asawin OR aspec aspent OR aspergum OR aspeX OR aspilets OR aspirem OR aspirgran OR aspirin\* OR aspirisucure OR aspisol OR aspo cid OR aspro OR asrina OR asrivo OR asta OR asteric OR astrix OR bayaspirina OR bayer OR biprin OR bokey OR boxazin OR breoprin OR bufferin OR naspro OR novasen).mp. OR ibu.ab.ti. OR (((external or physical or body) adj2 cool\*) or ((hypothermal or cold or cryogenic) adj3 (bath or therap\*))) or (cryotherapy or cryotreatment or cryotherap\*) or ((artificial or extracorporeal or induced or therapeutic) adj1 (hibernation or hypothermia\*)) or (refrigeration adj1 (anaesthesia or anesthesia))).mp.)

#### Embase

Date Searched: 2/24/2016

Number of Results: 902, 870 after limiting to English

'adult'/exp OR 'adult' OR adult\* OR geriatric\* OR elder OR nonagenarian\* OR octogenarian\* OR centenarian\* OR senium\* OR middle NEXT/1 age\* OR (old\* OR senior\*) NEAR/1 (citizen\* OR patient\* OR person\* OR woman OR man OR women OR men) AND ('fever'/exp OR fever\* OR hyperthermia\* OR pyrexia\* OR febrile OR 'sweating sickness' OR temperature) AND ('sepsis'/exp OR

sepsis OR septic\* OR urosepsis OR pyohemia\* OR blood NEAR/2 poison\* OR Bacteremia\* OR bacillaemia OR bacillemia OR bacteraemia OR bacteriemia OR Endotoxemia\* OR Fungemia\* OR fungaemia\* OR Candidemia\* OR candidaemia\* OR Parasitemia\* OR Viremia\* OR 'Fusobacterium necrophorum infection' OR necrobacillosis OR meningococcemia OR meningococcaemia OR 'toxic forward failure' OR 'critically ill' OR ((Toxic OR Endotoxic) NEAR/2 (Shock\*)) OR ((Lemierre\*) NEAR/1 (disease OR syndrome))) AND ('antipyretic agent'/exp OR 'acetylsalicylic acid'/exp OR 'ibuprofen'/exp OR 'ketoprofen'/exp OR 'naproxen'/exp OR 'nimesulide'/exp OR 'paracetamol'/exp OR 'cooling'/exp OR 'cryotherapy'/exp OR 'induced hypothermia'/exp OR ibu:ab,ti OR antipyretic\* OR antifebrile\* OR acetaminophen OR nimesulide OR aldoron OR aulin OR nimed OR nisulid OR halprin OR ibofen OR ibuprofen OR ibuprofene OR medicol OR medipren OR mediprin OR midol OR motrin OR neobrufen OR nerofen OR neutropain OR noritis OR anaprox OR anexopen OR apranax OR apraxin OR apronax OR naproxen OR naproxi OR naproxyn OR naprozyne OR naprux OR napxen OR narma OR narocin OR narox OR naxen OR naxopren OR naxyn OR neprossin OR norswel OR novonaprox OR novuran OR nuprafem OR nycopren OR pactens OR prexan OR priaxen OR primeral OR prodilor OR pronaxen OR proxen OR proxidol OR rahsen OR rs3540 OR rs3650 OR sanomed OR saritilron OR seladin OR ketoprofen OR kaltrofen OR keprofen OR acetophen OR acetosal OR 'acetosalicylic acid' OR acetosalin OR acetosalum OR 'acetyl salicylate' OR 'acetyl salicylic acid' OR 'acetylic salicylic acid' OR 'acetylo salicylic acid' OR actorin OR acylpyrin OR acylpyrine OR acytosal OR alasil OR 'albyl-e' OR 'alka seltzer' OR alkaspirin OR anasprin OR andol OR anopyrin OR ansin OR anthrom OR aptor OR arthralgyl OR asaflow OR asaphen OR asapor OR asatard OR asawin OR 'aspec aspent' OR aspergum OR aspex OR aspilets OR aspirem OR aspirgran OR aspirin\* OR aspirisucre OR aspisol OR 'aspo cid' OR aspro OR asrina OR asrivo OR asta OR asteric OR astrix OR bayaspirina OR bayer OR biprin OR bokey OR boxazin OR breoprin OR bufferin OR naspro OR novasen OR (external OR physical OR body) NEAR/2 (cool\*) OR (hypothermal OR cold OR cryogenic) NEAR/3 (bath OR therap\*) OR cryothermy OR cryotreatment OR cryotherap\* OR (artificial OR extracorporeal OR induced OR therapeutic) NEAR/1 (hibernation OR hypothermia\*) OR refrigeration NEAR/1 (anaesthesia OR anesthesia))

## CINAHL

Date Searched: 2/24/2016

Number of Results: 55, 54 after limiting to English

((((MH "Young Adult" OR MH "Adult" OR MH "Middle Age" OR MH "Aged" OR "adults" OR "adult" OR "Middle age" OR "Aged" OR MH "Geriatrics" OR geriatric\* OR Elder\* OR "Oldest Old" OR Nonagenarian\* OR Octogenarian\* OR Centenarian\* OR (senior\* N1 citizen\*) OR senium OR "very old" OR ((old\*) N1 (adult\* OR patient\* OR people OR men OR women OR man OR woman OR person\*))) AND ((MH "Fever+" OR fever\* OR hyperthermia\* OR pyrexia\* OR febrile OR "sweating sickness" OR temperature) AND (((MH "Sepsis+" OR sepsis OR septic\* OR urosepsis OR py?emia\* OR pyohemia\* OR blood N2 poison\* OR Bacteremia\* OR bacillaemia OR bacillemia OR bacteraemia OR bacteriemia OR Endotoxemia\* OR Fungemia\* OR fungaemia\* OR Candidemia\* OR candidaemia\* OR Parasitemia\* OR Viremia\* OR "Fusobacterium necrophorum infection" OR necrobacillosis OR meningococcemia OR meningococcaemia OR "toxic forward failure" OR "critically ill" OR ((Toxic OR Endotoxic) N2 (Shock\*)) OR ((Lemierre\*) N1 (disease OR syndrome))) AND (((MH "Acetaminophen" OR MH "Ibuprofen" OR MH "Aspirin" OR MH "Naproxen" OR MH "Hypothermia, Induced" OR MH "Cryotherapy" OR TI ibu OR AB ibu OR antipyretic\* OR antifebrile\* OR acetaminophen OR nimesulide OR aldoron OR aulin OR nimed OR nisulid OR halprin OR ibofen OR ibuprofen OR ibuprofene OR medicol OR medipren OR mediprin OR midol OR motrin OR neobrufen OR nerofen OR neutropain OR noritis OR anaprox OR anexopen OR apranax OR apraxin OR apronax OR naproxen OR naproxi OR naproxyn OR naprozyne OR naprux OR napxen OR narma OR narocin OR narox OR naxen OR naxopren OR naxyn OR neprossin OR norswel OR novonaprox OR novuran OR nuprafem OR

nycopren OR pactens OR prexan OR priaxen OR primeral OR prodilor OR pronaxen OR proxen OR proxidol OR rahsen OR rs3540 OR rs3650 OR sanomed OR saritilron OR seladin OR ketoprofen OR kaltrofen OR keprofen OR acetophen OR acetosal OR “acetosalicylic acid” OR acetosalin OR acetosalum OR “acetyl salicylate” OR “acetyl salicylic acid” OR “acetylic salicylic acid” OR “acetylo salicylic acid” OR actorin OR acylpyrin OR acylpyrine OR acytosal OR alasil OR “albyl-e” OR “alka seltzer” OR alkaspirin OR anasprin OR andol OR anopyrin OR ansin OR anthrom OR aptor OR arthralgyl OR asaflo OR asaphen OR asapor OR asatard OR asawin OR “aspec aspent” OR aspergum OR aspe OR aspilets OR aspirem OR aspirgran OR aspirin\* OR aspirisucere OR aspisol OR “aspo cid” OR aspro OR asrina OR asrivo OR asta OR asteric OR astrix OR bayaspirina OR bayer OR biprin OR bokey OR boxazin OR breoprin OR bufferin OR naspro OR novasen OR ((external OR physical OR body) N2 (cool\*)) OR ((hypothermal OR cold OR cryogenic) N3 (bath OR therap\*)) OR cryotherapy OR cryotreatment OR cryotherap\* OR ((artificial OR extracorporeal OR induced OR therapeutic) N1 (hibernation OR hypothermia\*)) OR ((refrigeration) N1 (anaesthesia OR anesthesia))

### Cochrane

Date Searched: 2/24/2016

Number of Results from each database in Cochrane

CDSR: 116

CENTRAL: 62

DARE : 3

EED: 4

([mh “Adult”] OR adult\* OR geriatric\* OR elder\* OR nonagenarian\* OR Octogenarian\* OR centenarian\* OR senium\* OR (senior NEAR/1 citizen\*) OR (middle NEAR/1 age\*) OR ((old\* OR senior) NEAR/1 (patient\* OR adult\* OR person\* OR people\* OR woman OR man OR women OR men))) AND ([mh fever] OR fever\* OR hyperthermia\* OR pyrexia\* OR febrile OR “sweating sickness” OR temperature) AND ([mh “sepsis”] OR sepsis OR septic\* OR urosepsis OR pyemia\* OR pyaemia\* OR pyohemia\* OR “critically ill” OR (blood NEAR/2 poison\*) OR Bacteremia\* OR bacillaemia OR bacillemia OR bacteraemia OR bacteriemia OR Endotoxemia\* OR Fungemia\* OR fungaemia\* OR Candidemia\* OR candidaemia\* OR Parasitemia\* OR Viremia\* OR “Fusobacterium necrophorum infection” OR necrobacillosis OR meningococemia OR meningococcaemia OR “toxic forward failure” OR ((Toxic OR Endotoxic) NEAR/2 (Shock\*)) OR ((Lemierre\*) NEAR/1 (disease OR syndrome))) AND ([mh “Antipyretics”] OR [mh “Acetaminophen”] OR [mh “Ibuprofen”] OR [mh “Aspirin”] OR [mh “Ketoprofen”] OR [mh “Naproxen”] OR [mh “Hypothermia, Induced”] OR [mh “Cryotherapy”] OR ibu:ab,ti OR antipyretic\* OR antifebrile\* OR acetaminophen OR nimesulide OR aldoron OR aulin OR nimed OR nisulid OR halprin OR ibofen OR ibuprofen OR ibuprofene OR medical OR medipren OR mediprin OR midol OR motrin OR neobrufen OR nerofen OR neutropain OR noritis OR anaprox OR anexopen OR apranax OR apraxin OR apronax OR naproxen OR naproxi OR naproxyn OR naprozyne OR naprux OR napxen OR narma OR narocin OR narox OR naxen OR naxopren OR naxyn OR neprossin OR norswel OR novonaprox OR novuran OR nuprafem OR nycopren OR pactens OR prexan OR priaxen OR primeral OR prodilor OR pronaxen OR proxen OR proxidol OR rahsen OR rs3540 OR rs3650 OR sanomed OR saritilron OR seladin OR ketoprofen OR kaltrofen OR keprofen OR acetophen OR acetosal OR “acetosalicylic acid” OR acetosalin OR acetosalum OR “acetyl salicylate” OR “acetyl salicylic acid” OR “acetylic salicylic acid” OR “acetylo salicylic acid” OR actorin OR acylpyrin OR acylpyrine OR acytosal OR alasil OR “albyl-e” OR “alka seltzer” OR alkaspirin OR anasprin OR andol OR anopyrin OR ansin OR anthrom OR aptor OR arthralgyl OR asaflo OR asaphen OR asapor OR asatard OR asawin OR “aspec aspent” OR aspergum OR aspe OR aspilets OR aspirem OR aspirgran OR aspirin\* OR aspirisucere OR aspisol OR “aspo cid” OR aspro OR asrina OR asrivo OR asta OR asteric OR astrix OR bayaspirina OR bayer OR biprin OR bokey OR boxazin OR breoprin OR bufferin OR naspro OR novasen OR (external OR physical OR body) NEAR/2 (cool\*) OR (hypothermal OR cold OR cryogenic) NEAR/3 (bath OR therap\*) OR cryotherapy OR cryotreatment OR cryotherap\* OR (artificial OR extracorporeal OR induced OR

therapeutic) NEAR/1 (hibernation OR hypothermia\*) OR refrigeration NEAR/1 (anaesthesia OR anesthesia))

### Scopus

Date Searched: 2/24/2016

Number of Results: 495, 473 after limiting to English

TITLE-ABS-KEY(adult\* OR geriatric\* OR elder\* OR nonagenarian\* OR Octogenarian\* OR centenarian\* OR senium\*) OR TITLE-ABS-KEY(middle W/1 age\*) OR TITLE-ABS-KEY((old\* OR senior) W/1 (citizen\* OR patient\* OR adult\* OR person\* OR people\* or woman or man or women or men))) AND TITLE-ABS-KEY(fever\* OR hyperthermia\* OR pyrexia\* OR febrile OR "sweating sickness" OR temperature) AND (TITLE-ABS-KEY(sepsis OR septic\* OR urosepsis OR pyemia\* OR pyaemia\* OR pyohemia\*) OR TITLE-ABS-KEY(blood W/2 poison\*) OR TITLE-ABS-KEY(Bacteremia\* OR bacillaemia OR bacillemia OR bacteraemia OR bacteriemia OR Endotoxemia\* OR Fungemia\* OR fungaemia\* OR Candidemia\* OR candidaemia\* OR Parasitemia\* OR Viremia\* OR "Fusobacterium necrophorum infection" OR necrobacillosis OR meningococcemia OR meningococcaemia OR "toxic forward failure" OR "critical illness") OR TITLE-ABS-KEY((Toxic OR Endotoxic) W/2 (Shock\*)) OR TITLE-ABS-KEY((Lemierre\*) W/1 (disease OR syndrome))) AND (TITLE-ABS-KEY (ibu OR antipyretic\* OR antifebrile\* OR acetaminophen OR nimesulide OR aldoron OR aulin OR nimed OR nisulid OR halprin OR ibofen OR ibuprofen OR ibuprofene OR medicol OR medipren OR mediprin OR midol OR motrin OR neobrufen OR nerofen OR neutropain OR noritis OR anaprox OR anexopen OR apranax OR apraxin OR apronax OR naproxen OR naproxi OR naproxyn OR naprozyne OR naprux OR napxen OR narma OR narocin OR narox OR naxen OR naxopren OR naxyn OR neprossin OR norswel OR novonaprox OR novuran OR nuprafem OR nycopren OR pactens OR prexan OR priaxen OR primeral OR prodilor OR pronaxen OR proxen OR proxidol OR rahsen OR rs3540 OR rs3650 OR sanomed OR saritilon OR seladin OR ketoprofen OR kaltrofen OR keprofen OR acetophen OR acetosal OR "acetosalicylic acid" OR acetosalin OR acetosalum OR "acetyl salicylate" OR "acetyl salicylic acid" OR "acetylic salicylic acid" OR "acetylo salicylic acid" OR actorin OR acylpyrin OR acylpyrine OR acytosal OR alasil OR "albyl-e" OR "alka seltzer" OR alkaspirin OR anasprin OR andol OR anopyrin OR ansin OR anthrom OR aptor OR arthralgyl OR asaflo OR asaphen OR asapor OR asatard OR asawin OR "aspec aspent" OR aspergum OR aspex OR aspilets OR aspirem OR aspirgran OR aspirin\* OR aspirisucre OR aspisol OR "aspo cid" OR aspro OR asrina OR asrivo OR asta OR asteric OR astrix OR bayaspirina OR bayer OR biprin OR bokey OR boxazin OR breoprin OR bufferin OR naspro OR novasen ) OR TITLE-ABS-KEY (( external OR physical OR body ) W/2 ( cool\* )) OR TITLE-ABS-KEY (( hypothermal OR cold OR cryogenic ) W/3 ( bath OR therap\* )) OR TITLE-ABS-KEY ( cryothermy OR cryotreatment OR cryotherap\* ) OR TITLE-ABS-KEY ((artificial OR extracorporeal OR induced OR therapeutic ) W/1 (hibernation OR hypothermia\*)) OR TITLE-ABS-KEY ((refrigeration ) W/1 (anaesthesia OR anesthesia )))

### ClinicalTrials.gov

Date Searched: 2/15/2016

Number of Results: 2

Conditions: Sepsis AND Fever

Interventions: antipyretics OR cooling

Adults
