# Supplementary material for: Antipyretic Therapy in Critically Ill Septic Patients: A Systematic Review and Meta-Analysis
Source: PubMed Central journal article supplement — Crit Care Med. 2017 Apr 14;45(5):806–13. doi: 10.1097/CCM.0000000000002285 (PMC5389594; doi:10.1097/ccm.0000000000002285), 2017-04-14
Supplement: ccm-45-806-s004.pdf [file ccm-45-806-s004.pdf]

## **Inclusion and Exclusion Criteria for Meta-Analysis of Antipyretic Therapy in Critically Ill Septic Patients**

### **Inclusion criteria:**

- (1) observational or randomized studies of adult patients with sepsis/infection
- (2) evaluation of antipyretic treatment (pharmacological or physical cooling)
- (3) mortality reported as an outcome
- (4) English-language version available.

### **Exclusion criteria:**

- (1) editorials and reviews
- (2) non-human studies
- (3) studies including pediatric patients
- (4) healthy volunteer studies
- (5) studies of patients with neurological injury
- (6) lack of a control or permissive febrile group
- (7) Insufficient data reported for analysis
