# Supplementary material for: Antipyretic Therapy in Critically Ill Septic Patients: A Systematic Review and Meta-Analysis
Source: PubMed Central journal article supplement — Crit Care Med. 2017 Apr 14;45(5):806–13. doi: 10.1097/CCM.0000000000002285 (PMC5389594; doi:10.1097/ccm.0000000000002285), 2017-04-14
Supplement: ccm-45-806-s005.pdf [file ccm-45-806-s005.pdf]

**Supplemental Table 1. Studies Excluded after Full-Text Review**

| <b>Study</b>                    | <b>Reason for exclusion</b>                                                                                                 | <b>Exclusion classification<sup>a</sup></b> |
|---------------------------------|-----------------------------------------------------------------------------------------------------------------------------|---------------------------------------------|
| Arons et al (1) (1999)          | Sub-study of included study                                                                                                 | D                                           |
| Boyle et al (2) (1997)          | Infection status of patients not reported; no permissive fever control group; mortality not reported                        | NS                                          |
| Boyle et al (3) (2011)          | Infection status of patients not reported; mortality not reported; no permissive fever control group                        | NS                                          |
| Chandralekha et al (4) (2008)   | Not relevant to antipyretic therapy                                                                                         | A                                           |
| Clemmer et al (5) (1992)        | Not relevant to antipyretic therapy                                                                                         | A                                           |
| Creechan et al (6) (2001)       | No permissive fever group                                                                                                   | C                                           |
| Cruz et al (7) (2002)           | Included non-septic patients; no permissive fever control group; mortality not reported                                     | NS                                          |
| De Maat et al (8) (2010)        | Included non-septic patients; no permissive fever control group; mortality not reported                                     | NS                                          |
| Gozzoli et al (9) (2001)        | Mortality not reported specifically for subset of infected patients and this data could not be obtained                     | NS                                          |
| Gozzoli et al (10) (2004)       | Included non-septic patients; no permissive fever control group; mortality not reported                                     | NS                                          |
| Greenberg et al (11) (2010)     | Included non-septic patients; mortality not reported                                                                        | NS                                          |
| Hammond et al (12) (2011)       | Mortality not reported for antipyretic and control groups                                                                   | M                                           |
| Hammond et al (13) (2013)       | Mortality not reported for antipyretic and control groups                                                                   | M                                           |
| Henker et al (14) (2001)        | Included non-septic patients; no permissive fever control group; mortality not reported                                     | NS                                          |
| Hersch et al (15) (2008)        | No permissive fever control group; mortality not reported                                                                   | C                                           |
| Honarmand et al (16) (2012)     | Mortality not reported specifically for subset of infected patients and this data could not be obtained                     | NS                                          |
| Kiekkas et al (17) (2007)       | Included non-septic patients; not relevant to antipyretic therapy; mortality not reported                                   | NS                                          |
| Kiekkas et al (18) (2010)       | Included non-septic patients; not relevant to antipyretic therapy; mortality not reported                                   | NS                                          |
| Krajcova et al (19) (2013)      | Included non-septic patients; mortality not reported                                                                        | NS                                          |
| Krudsod et al (20) (2010)       | Included non-septic patients                                                                                                | NS                                          |
| Laupland et al (21) (2012)      | Included non-septic patients; not relevant to antipyretic therapy                                                           | NS                                          |
| Manthous et al (22) (1995)      | Included non-septic patients; no permissive fever control group; mortality not reported                                     | NS                                          |
| Matsuda et al (23) (1995)       | No permissive fever control group; mortality not reported                                                                   | C                                           |
| Mohr et al (24) (2010)          | Duplicate data as of included study                                                                                         | D                                           |
| Mohr et al (25) (2011)          | Duplicate data as of included study                                                                                         | D                                           |
| Mohr et al (26) (2013)          | Duplicate data as of included study                                                                                         | D                                           |
| Morris et al (27) (2010)        | Mortality not reported specifically for subset of infected patients and this data could not be obtained                     | NS                                          |
| Mourvillier et al (28) (2013)   | Not relevant to antipyretic therapy                                                                                         | A                                           |
| Niven et al (29) (2011)         | Included non-septic patients; mortality not reported                                                                        | NS                                          |
| Niven et al (30) (2012)         | Duplicate data as of included study                                                                                         | D                                           |
| Niven et al (31) (2012)         | Included non-septic patients; mortality not reported                                                                        | NS                                          |
| O'Donnell et al (32) (1997)     | Included non-septic patients; mortality not reported                                                                        | NS                                          |
| Pernerstorfer et al (33) (1995) | No permissive fever control group                                                                                           | C                                           |
| Pernerstorfer et al (34) (1999) | Non-septic patients included; mortality not reported                                                                        | NS                                          |
| Poblete et al (35) (1997)       | Included non-septic patients; included patients with head injury; no permissive fever control group; mortality not reported | NS                                          |
| Promes et al (36) (2011)        | Included non-septic patients                                                                                                | NS                                          |
| Rokyta et al (37) (2004)        | No permissive fever control group                                                                                           | C                                           |
| Satsuta et al (38) (2013)       | Insufficient data to include in meta-analysis                                                                               | I                                           |

**Supplemental Table 1. Studies Excluded after Full-Text Review (continued)**

| <b>Study</b>               | <b>Reason for exclusion</b>                                                 | <b>Exclusion classification<sup>a</sup></b> |
|----------------------------|-----------------------------------------------------------------------------|---------------------------------------------|
| Schulman et al (39) (2005) | Included non-septic patients                                                | NS                                          |
| Young et al (40) (2011)    | No control group; mortality not reported for antipyretic and control groups | C                                           |
| Yang et al (41) (2013)     | No permissive fever control group                                           | C                                           |

<sup>a</sup>Exclusion classification symbols are as follows: D, duplicate data or sub-study of included study; NS, non-septic patients included in the study; A, study not relevant to anti-pyretic therapy; C, study did not include a permissive fever control group; M, mortality not reported as an outcome; I, insufficient data reported to analyze.

**Supplemental Table 2. Descriptive Characteristics of Randomized and Observational Studies**

| Author (year)               | Study Design | Number of centers; countries | Setting              | Sample size <sup>a</sup> | Main inclusion criteria                                                                                                                | Intervention or antipyretic therapy evaluated                                                                                                                                   | Control                                                                                                                                                         | Duration of intervention | Primary outcome                                                         |
|-----------------------------|--------------|------------------------------|----------------------|--------------------------|----------------------------------------------------------------------------------------------------------------------------------------|---------------------------------------------------------------------------------------------------------------------------------------------------------------------------------|-----------------------------------------------------------------------------------------------------------------------------------------------------------------|--------------------------|-------------------------------------------------------------------------|
| Bernard et al (42) (1991)   | RCT          | 2; United States             | ICU                  | 30                       | Severe sepsis                                                                                                                          | Ibuprofen 800 mg rectally every 4 hours                                                                                                                                         | Placebo                                                                                                                                                         | 12 hours                 | Urinary eicosanoid metabolite concentrations                            |
| Haupt et al (43) (1991)     | RCT          | 4; United States             | Medical ICU          | 29                       | Severe sepsis                                                                                                                          | Ibuprofen 600 mg or 800 mg IV once, then ibuprofen 800 mg rectally every 6 hours                                                                                                | Placebo                                                                                                                                                         | 24 hours                 | Not specified                                                           |
| Bernard et al (44) (1997)   | RCT          | 7; United States, Canada     | Medical/Surgical ICU | 455                      | Severe sepsis                                                                                                                          | Ibuprofen 10 mg/kg (maximum dose 800 mg) IV every 6 hours                                                                                                                       | Placebo                                                                                                                                                         | 48 hours                 | 30-day mortality                                                        |
| Memis et al (45) (2004)     | RCT          | 1; Turkey                    | ICU                  | 40                       | Severe sepsis, positive culture data                                                                                                   | Lornoxicam 8 mg IV every 12 hours                                                                                                                                               | Placebo                                                                                                                                                         | 72 hours                 | Not specified                                                           |
| Schortgen et al (46) (2012) | RCT          | 7; France                    | Medical/Surgical ICU | 200                      | Septic shock, fever ( $\geq 38.4^{\circ}\text{C}$ )                                                                                    | External cooling to achieve normothermia ( $36.5\text{-}37.0^{\circ}\text{C}$ )                                                                                                 | Physical cooling only if temperature $> 41.0^{\circ}\text{C}$                                                                                                   | 48 hours                 | Proportion of patients with a 50% decrease in baseline vasopressor dose |
| Niven et al (47) (2013)     | RCT          | 2; Canada                    | Medical/Surgical ICU | 26                       | Fever (two consecutive values $\geq 38.3^{\circ}\text{C}$ two hours apart or a single value $\geq 39.5^{\circ}\text{C}$ ) <sup>b</sup> | Acetaminophen 650 mg enterally every 6 hours as needed for temperatures $\geq 38.3^{\circ}\text{C}$ and physical cooling as needed for temperatures $\geq 39.5^{\circ}\text{C}$ | Acetaminophen 650 mg enterally every 6 hours only if temperatures $\geq 40.0^{\circ}\text{C}$ and physical cooling for temperatures $\geq 40.5^{\circ}\text{C}$ | ICU length of stay       | 28-day mortality                                                        |
| Janz et al (48) (2015)      | RCT          | 1; United States             | Medical ICU          | 51                       | Severe sepsis, detectable cell-free hemoglobin                                                                                         | Acetaminophen (1 g) enterally every 6 hours                                                                                                                                     | Placebo                                                                                                                                                         | 3 days                   | Plasma F2-Isoprostane                                                   |

**Supplemental Table 2. Descriptive Characteristics of Randomized and Observational Studies (continued)**

| Author (year)                       | Study Design            | Number of centers; countries | Setting              | Sample size <sup>a</sup> | Main inclusion criteria                                                        | Intervention or antipyretic therapy evaluated                                                               | Control                                               | Duration of intervention                                                                                                                          | Primary outcome              |
|-------------------------------------|-------------------------|------------------------------|----------------------|--------------------------|--------------------------------------------------------------------------------|-------------------------------------------------------------------------------------------------------------|-------------------------------------------------------|---------------------------------------------------------------------------------------------------------------------------------------------------|------------------------------|
| Young et al (49) (2015)             | RCT                     | 23; Australia, New Zealand   | Medical/Surgical ICU | 700                      | Sepsis, fever ( $\geq 38.0^{\circ}\text{C}$ )                                  | Acetaminophen 1 g IV every 6 hours; physical cooling as needed for temperatures $\geq 39.5^{\circ}\text{C}$ | Placebo                                               | 28 days or until ICU discharge, fever resolution, cessation of antimicrobial therapy, death, or development of contraindication to the study drug | ICU-free days to day 28      |
| Pestaña et al (50) (2007)           | Historically controlled | 1; Spain                     | Surgical ICU         | 30                       | Septic shock, fever ( $\geq 39.5^{\circ}\text{C}$ )                            | CVVHD aimed at a core temperature of $38.0^{\circ}\text{C}$                                                 | No CVVHD                                              | Mean (SD) 51 (40) hours                                                                                                                           | 28-day mortality             |
| Selladurai et al (51) (2011)        | Cross-sectional         | 1; Australia                 | Medical/Surgical ICU | 106                      | Sepsis                                                                         | Acetaminophen                                                                                               | Absence of acetaminophen                              | First 7 days of ICU stay                                                                                                                          | Not specified                |
| Lee et al (52) (2012)               | Prospective cohort      | 25; Japan, Korea             | Medical/Surgical ICU | 1425                     | ICU admission > 48 hours <sup>b</sup>                                          | Antipyretic medication and physical cooling                                                                 | Absence of antipyretic medication or physical cooling | ICU length of stay                                                                                                                                | 28-day in-hospital mortality |
| Mohr et al (53) (2012) <sup>c</sup> | Retrospective cohort    | 1; United States             | ED                   | 171                      | Severe sepsis, fever ( $\geq 38.3^{\circ}\text{C}$ )                           | Antipyretic medication                                                                                      | Absence of antipyretic medication                     | ED length of stay                                                                                                                                 | 28-day in-hospital mortality |
| Mohr et al (54) (2012)              | Retrospective cohort    | 1; United States             | Hospital (71% ICU)   | 278                      | Severe sepsis, fever ( $\geq 38.3^{\circ}\text{C}$ ), Gram-negative bacteremia | Antipyretic medication                                                                                      | Absence of antipyretic medication                     | Between 4 hours before and 6 hours after positive blood culture                                                                                   | 28-day in-hospital mortality |
| Janz et al (55) (2013)              | Case-control            | 1; United States             | Medical/Surgical ICU | 391                      | Sepsis                                                                         | Acetaminophen                                                                                               | Absence of acetaminophen                              | First 96 hours of ICU stay                                                                                                                        | Hospital mortality           |

**Supplemental Table 2. Descriptive Characteristics of Randomized and Observational Studies (continued)**

| Author (year)            | Study Design         | Number of centers; countries | Setting              | Sample size <sup>a</sup> | Main inclusion criteria    | Intervention or antipyretic therapy evaluated | Control                                               | Duration of intervention | Primary outcome    |
|--------------------------|----------------------|------------------------------|----------------------|--------------------------|----------------------------|-----------------------------------------------|-------------------------------------------------------|--------------------------|--------------------|
| Zhang et al (56) (2015)  | Case-control         | 1; United States             | Medical/Surgical ICU | 15268                    | Sepsis                     | Antipyretic medication and physical cooling   | Absence of antipyretic medication or physical cooling | ICU length of stay       | ICU mortality      |
| Suzuki et al (57) (2015) | Retrospective cohort | 4; Australia                 | Medical/Surgical ICU | 15818                    | ICU admission <sup>b</sup> | Acetaminophen                                 | Absence of acetaminophen                              | ICU length of stay       | Hospital mortality |

<sup>a</sup>Total number of patients enrolled in the study. <sup>b</sup>Outcome data available for subgroup of septic patients. <sup>c</sup>Abstract only available. RCT, randomized controlled trial; IV, intravenous; ICU, intensive care unit; CVVHD, continuous venovenous hemofiltration; ED, emergency department.

**Supplemental Table 3. Patient Baseline Characteristics of Randomized Studies**

| Author (year)               | Study group  | Sample size <sup>a</sup> | Male, No. (%) | Age <sup>b</sup> (years) | Fever, <sup>c</sup> No. (%) | Illness severity scores <sup>b</sup>     | Mechanical ventilation, No. (%) | Vaso-pressors, No. (%) | Baseline body temperature <sup>b,d</sup> (°C) | Baseline heart rate <sup>b</sup> (bpm) | Baseline minute ventilation <sup>b</sup> (L/min) |
|-----------------------------|--------------|--------------------------|---------------|--------------------------|-----------------------------|------------------------------------------|---------------------------------|------------------------|-----------------------------------------------|----------------------------------------|--------------------------------------------------|
| Bernard et al (1991) (42)   | Intervention | 16                       | -             | 54 (14)                  | -                           | -                                        | 13 (81)                         | 8 (50)                 | 38.1 (1.2)                                    | 112 (20)                               | 13.9 (4.4)                                       |
|                             | Control      | 14                       | -             | 54 (15)                  | -                           | -                                        | 11 (79)                         | 7 (50)                 | 38.1 (1.1)                                    | 108 (22)                               | 13.4 (6.0)                                       |
| Haupt et al (1991) (43)     | Intervention | 16                       | 10 (63)       | 48 (16)                  | -                           | -                                        | 13 (81)                         | 10 (63)                | 38.5 (1.6)                                    | 118 (16)                               | 15.8 (6.4)                                       |
|                             | Control      | 13                       | 6 (46)        | 55 (14)                  | -                           | -                                        | 11 (85)                         | 7 (54)                 | 38.5 (1.4)                                    | 126 (14)                               | 18.9 (10.5)                                      |
| Bernard et al (1997) (44)   | Intervention | 224                      | 94 (42)       | 54 (18)                  | 200 (89)                    | APACHE II: 16 (7)                        | 175 (78)                        | 146 (65)               | 37.9 (1.5)                                    | 113 (15)                               | 14.3 (6.0)                                       |
|                             | Control      | 231                      | 79 (34)       | 56 (16)                  | 211 (91)                    | APACHE II: 15 (7)                        | 176 (76)                        | 147 (64)               | 38.0 (1.5)                                    | 114 (15)                               | 13.9 (6.1)                                       |
| Memis et al (2004) (45)     | Intervention | 20                       | 13 (65)       | 49 (19-87) <sup>e</sup>  | -                           | APACHE II: 17 (4)<br>SOFA: 6 (2)         | -                               | 7 (35)                 | 37.8 (0.8)                                    | 98 (24)                                | -                                                |
|                             | Control      | 20                       | 9 (45)        | 51 (20-89) <sup>e</sup>  | -                           | APACHE II: 18 (4)<br>SOFA: 6 (2)         | -                               | 8 (40)                 | 37.6 (0.6)                                    | 95 (17)                                | -                                                |
| Schortgen et al (2012) (46) | Intervention | 101                      | 75 (74)       | 62 (51-70)               | 101 (100) <sup>f</sup>      | SOFA: 11 (9-14)<br>SAPS3: 77 (67-85)     | 101 (100)                       | 101 (100)              | 38.8 (38.6-39.2)                              | -                                      | -                                                |
|                             | Control      | 99                       | 67 (68)       | 61 (49-70)               | 99 (100) <sup>f</sup>       | SOFA: 11 (9-14)<br>SAPS3: 79 (68-87)     | 99 (100)                        | 99 (100)               | 38.9 (38.5-39.3)                              | -                                      | -                                                |
| Niven et al (2013) (47)     | Intervention | 14                       | 8 (57)        | 53 (43-67)               | 14 (100)                    | APACHE II: 18 (7)                        | 14 (100)                        | 3 (21)                 | 37.8 (0.7) <sup>g</sup>                       | -                                      | -                                                |
|                             | Control      | 12 <sup>h</sup>          | 8 (6)         | 58 (49-69)               | 12 (100)                    | APACHE II: 19 (6)                        | 12 (100)                        | 7 (58)                 | 37.5 (0.3) <sup>g</sup>                       | -                                      | -                                                |
| Janz et al (2015) (48)      | Intervention | 18                       | 9 (50)        | 50 (41-64)               | 8 (44) <sup>ij</sup>        | APACHE II: 21.0 (16-29)<br>SOFA: 6 (4-9) | 8 (44)                          | 8 (44)                 | 37.7 (37.0-38.5) <sup>k</sup>                 | 103 (21) <sup>j</sup>                  | -                                                |
|                             | Control      | 22                       | 12 (55)       | 58 (47-63)               | 9 (41) <sup>ij</sup>        | APACHE II: 22 (17-24)<br>SOFA: 6 (5-8)   | 6 (27)                          | 10 (45)                | 37.9 (37.2-38.4) <sup>k</sup>                 | 96 (18) <sup>j</sup>                   | -                                                |
| Young et al (2015) (49)     | Intervention | 347                      | 224 (65)      | 59 (17)                  | 347 (100) <sup>i</sup>      | APACHE II: 19 (7)                        | 176 (51)                        | 174 (50)               | 38.8 (0.6) <sup>k</sup>                       | 100 (21)                               | 10.3 (4.0)                                       |
|                             | Control      | 344                      | 225 (65)      | 58 (17)                  | 344 (100) <sup>i</sup>      | APACHE II: 19 (8)                        | 182 (53)                        | 181 (53)               | 38.7 (0.6) <sup>k</sup>                       | 100 (21)                               | 9.8 (3.3)                                        |

Dashes indicate information not provided. <sup>a</sup>Number of patients included in analysis of baseline characteristics. <sup>b</sup>Continuous variables reported as mean (standard deviation) or median (interquartile range) unless otherwise indicated. <sup>c</sup>Fever defined as a temperature  $\geq 38.3^{\circ}\text{C}$  unless otherwise specified. <sup>d</sup>Baseline point measurement unless otherwise specified. <sup>e</sup>Median (range) reported. <sup>f</sup>Fever defined as temperature  $\geq 38.4^{\circ}\text{C}$ . <sup>g</sup>Baseline daily mean temperature. <sup>h</sup>Includes three patients without sepsis. <sup>i</sup>Fever defined as temperature  $\geq 38.0^{\circ}\text{C}$ . <sup>j</sup>Information provided via personal communication with author. <sup>k</sup>Baseline maximum temperature. APACHE II, Acute Physiology and Chronic Health Evaluation II; SOFA, sequential organ failure assessment; SAPS3, Simplified Acute Physiology Score 3.

**Supplemental Table 4. Outcome Data for Randomized Studies**

| Author (year)               | Study group  | Sample size <sup>a</sup> | 28-day mortality, No. (%) | Hospital mortality, No. (%) | ICU mortality, No. (%) | Other reported mortality, No. (%)  | Shock reversal, No./total with shock (%) | Incidence of nosocomial infections, No. (%) | Post-intervention body temperature <sup>b,c</sup> (°C) | Post-intervention heart rate <sup>b</sup> (bpm) | Post-intervention minute ventilation <sup>b</sup> (L/min) |
|-----------------------------|--------------|--------------------------|---------------------------|-----------------------------|------------------------|------------------------------------|------------------------------------------|---------------------------------------------|--------------------------------------------------------|-------------------------------------------------|-----------------------------------------------------------|
| Bernard et al (42) (1991)   | Intervention | 16                       | 3 (19) <sup>d</sup>       | -                           | -                      | 5-day: 1 (6)                       | 7/8 (88)                                 | -                                           | 37.0 (0.4)                                             | 93 (16)                                         | 13.3 <sup>e</sup>                                         |
|                             | Control      | 14                       | 6 (43) <sup>d</sup>       | -                           | -                      | 5-day: 1 (7)                       | 3/7 (43)                                 | -                                           | 38.1 (1.5)                                             | 107 (22)                                        | 15.1 <sup>e</sup>                                         |
| Haupt et al (43) (1991)     | Intervention | 16                       | -                         | 9 (56)                      | -                      | -                                  | 4/10 (40)                                | 3 (19)                                      | 37.0 (0.8)                                             | 103 (16)                                        | 14.9 (6.4)                                                |
|                             | Control      | 13                       | -                         | 4 (31)                      | -                      | -                                  | 5/7 (71)                                 | 1 (8)                                       | 38.1 (1.1)                                             | 113 (22)                                        | 13.3 (5.8)                                                |
| Bernard et al (44) (1997)   | Intervention | 224                      | 83 (37)                   | -                           | -                      | -                                  | -                                        | 18 (8)                                      | 36.9 (1.5)                                             | 99 (15)                                         | 13.4 (6.0)                                                |
|                             | Control      | 231                      | 92 (40)                   | -                           | -                      | -                                  | -                                        | 26 (11)                                     | 37.5 (1.5)                                             | 104 (15)                                        | 13.5 (6.1)                                                |
| Memis et al (45) (2004)     | Intervention | 20                       | -                         | 7 (35)                      | 7 (35)                 | -                                  | -                                        | -                                           | 37.9 (0.4)                                             | 96 (22)                                         | -                                                         |
|                             | Control      | 20                       | -                         | 8 (40)                      | 8 (40)                 | -                                  | -                                        | -                                           | 37.8 (0.5)                                             | 97 (22)                                         | -                                                         |
| Schortgen et al (46) (2012) | Intervention | 101                      | -                         | 43 (43)                     | 35 (35)                | 14-day: 19 (19)                    | 87/101 (86)                              | 32.6/1000 ICU days <sup>f</sup>             | 36.8 (0.6)                                             | -                                               | -                                                         |
|                             | Control      | 99                       | -                         | 48 (48)                     | 43 (43)                | 14-day: 34 (34)                    | 72/99 (73)                               | 23.8/1000 ICU days <sup>f</sup>             | 37.6 (1.2)                                             | -                                               | -                                                         |
| Niven et al (47) (2013)     | Intervention | 14                       | 3 (21)                    | -                           | -                      | -                                  | -                                        | 0 (0)                                       | 38.0 (0.7) <sup>g</sup>                                | -                                               | -                                                         |
|                             | Control      | 12 <sup>h</sup>          | 2 (22) <sup>h,i</sup>     | -                           | -                      | -                                  | -                                        | 0 (0) <sup>h,i</sup>                        | 37.7 (0.7) <sup>g</sup>                                | -                                               | -                                                         |
| Janz et al (48) (2015)      | Intervention | 18                       | -                         | 1 (6)                       | -                      | -                                  | -                                        | -                                           | 36.9 (36.9-37.1) <sup>j</sup>                          | 97 (17) <sup>i</sup>                            | -                                                         |
|                             | Control      | 22                       | -                         | 4 (18)                      | -                      | -                                  | -                                        | -                                           | 37.1 (36.9-37.4) <sup>j</sup>                          | 88 (24) <sup>i</sup>                            | -                                                         |
| Young et al (49) (2015)     | Intervention | 346                      | 48 (14)                   | -                           | -                      | 14-day: 27 (8)<br>90-day: 55 (16)  | -                                        | -                                           | 36.9 (0.7) <sup>g</sup>                                | -                                               | -                                                         |
|                             | Control      | 344                      | 47 (14)                   | -                           | -                      | 14-day: 36 (10)<br>90-day: 57 (17) | -                                        | -                                           | 37.2 (0.8) <sup>g</sup>                                | -                                               | -                                                         |

Dashes indicate information not provided. <sup>a</sup>Number of patients included in analysis of outcomes. <sup>b</sup>Continuous variables reported as mean (standard deviation) or median (interquartile range). <sup>c</sup>Post-intervention point measurement unless otherwise specified. <sup>d</sup>30-day mortality reported. <sup>e</sup>No measure of dispersion provide. <sup>f</sup>For meta-analysis, converted to number of patients based on mean ICU length of stay in each group. <sup>g</sup>Post-intervention daily mean temperature on study day 2. <sup>h</sup>Three patients without sepsis were not included in analysis of mortality and incidence of nosocomial infections for this meta-analysis. <sup>i</sup>Information provided via personal communication with author. <sup>j</sup>Maximum temperature on study day 3. ICU, intensive care unit.

**Supplemental Table 5. Risk of Bias Assessment of Randomized Studies Using the Cochrane Collaboration Risk of Bias Tool**

|                             | <b>Sequence generation</b> | <b>Allocation concealment</b> | <b>Blinding of participants/ personnel</b> | <b>Blinding of outcome assessment</b> | <b>Incomplete outcome data</b> | <b>Selective outcome reporting</b> | <b>Other sources of bias</b> |
|-----------------------------|----------------------------|-------------------------------|--------------------------------------------|---------------------------------------|--------------------------------|------------------------------------|------------------------------|
| Bernard et al (42) (1991)   | Low                        | Low                           | Low                                        | Low                                   | Low                            | Unclear                            | Low                          |
| Haupt et al (43) (1991)     | Low                        | Low                           | Low                                        | Low                                   | Unclear                        | Unclear                            | Low                          |
| Bernard et al (44) (1997)   | Low                        | Low                           | Low                                        | Low                                   | Low                            | Low                                | Low                          |
| Memis et al (45) (2004)     | Low                        | Low                           | Low                                        | Low                                   | Unclear                        | Unclear                            | Low                          |
| Schortgen et al (46) (2012) | Low                        | Low                           | High                                       | High                                  | Low                            | Unclear                            | Low                          |
| Niven et al (47) (2013)     | Low                        | Low                           | High                                       | Low                                   | Low                            | Low                                | Low                          |
| Janz et al (48) (2015)      | Low                        | Low                           | Low                                        | Low                                   | Low                            | Unclear                            | Low                          |
| Young et al (49) (2015)     | Low                        | Low                           | Low                                        | Low                                   | Low                            | Low                                | Low                          |



## Supplemental Figure 1. Results of Meta-Analyses of Early Mortality

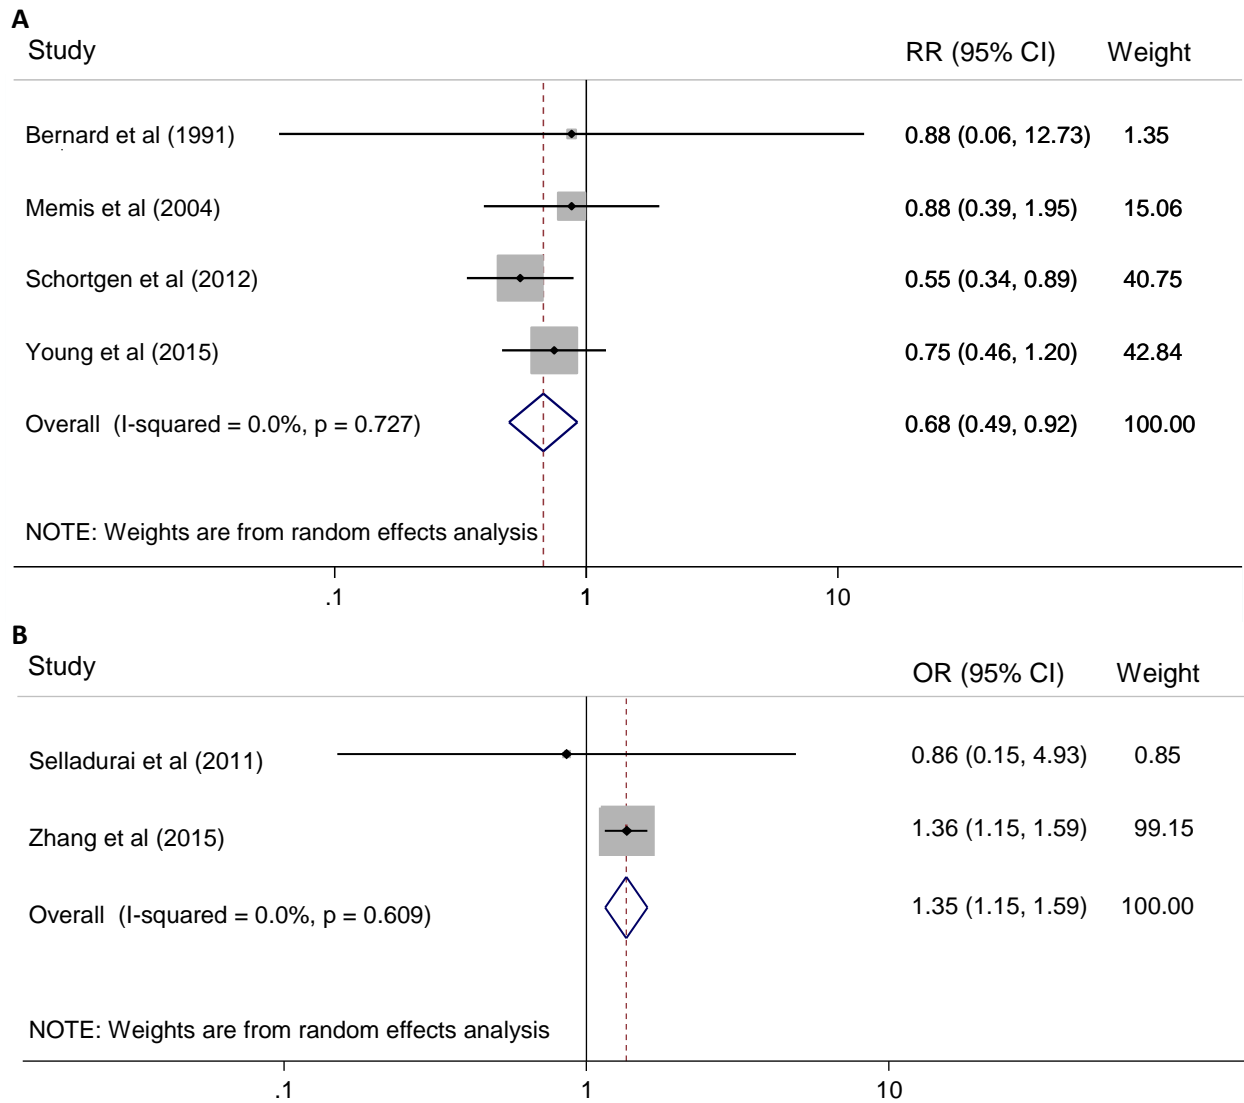

Meta-analysis results of early mortality (occurring within 14 days or in the intensive care unit) in patients treated with antipyretic therapy vs control in (A) randomized studies and (B) observational studies. A relative risk (RR) or odds ratio (OR) < 1 favors antipyretic therapy. The size of the grey box corresponds to weight in the random effects analysis. RR, relative risk; 95% CI, 95% confidence interval; OR, odds ratio.

## Supplemental Figure 2. Results of Meta-Analyses of Acquisition of Nosocomial Infections and Shock Reversal

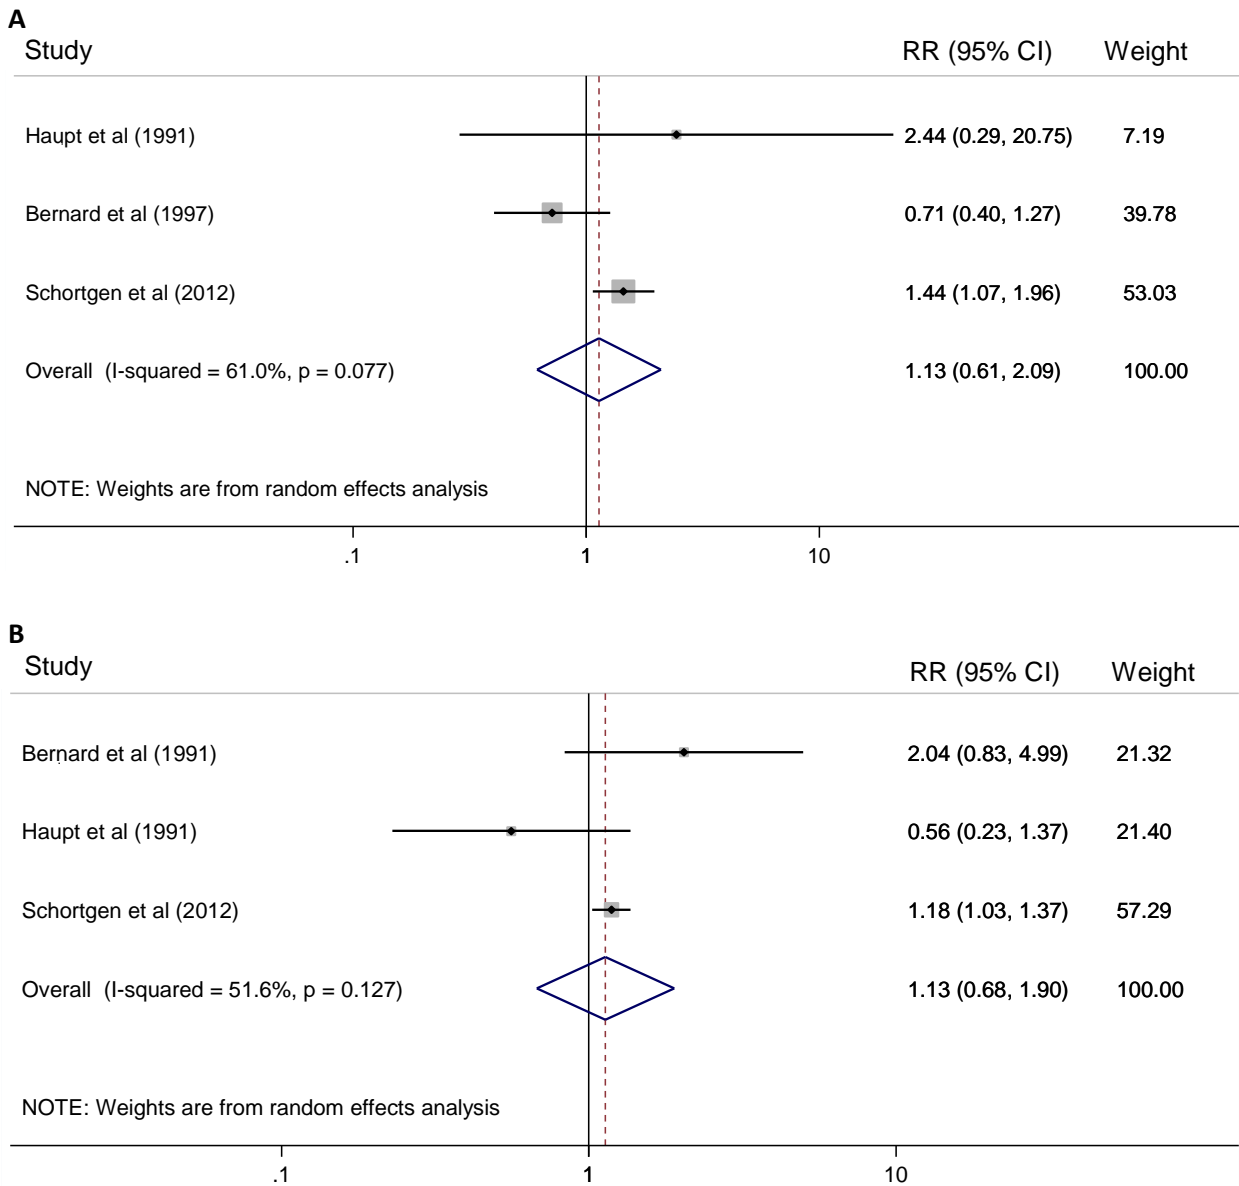

Meta-analysis results of (A) acquisition of nosocomial infections and (B) shock reversal in patients treated with antipyretic therapy vs control in randomized studies. A relative risk (RR) < 1 favors antipyretic therapy. The size of the grey box corresponds to weight in the random effects analysis. RR, relative risk; 95% CI, 95% confidence interval; OR, odds ratio.

### Supplemental Figure 3. Results of Meta-Analyses of Post-Intervention Physiological Parameters

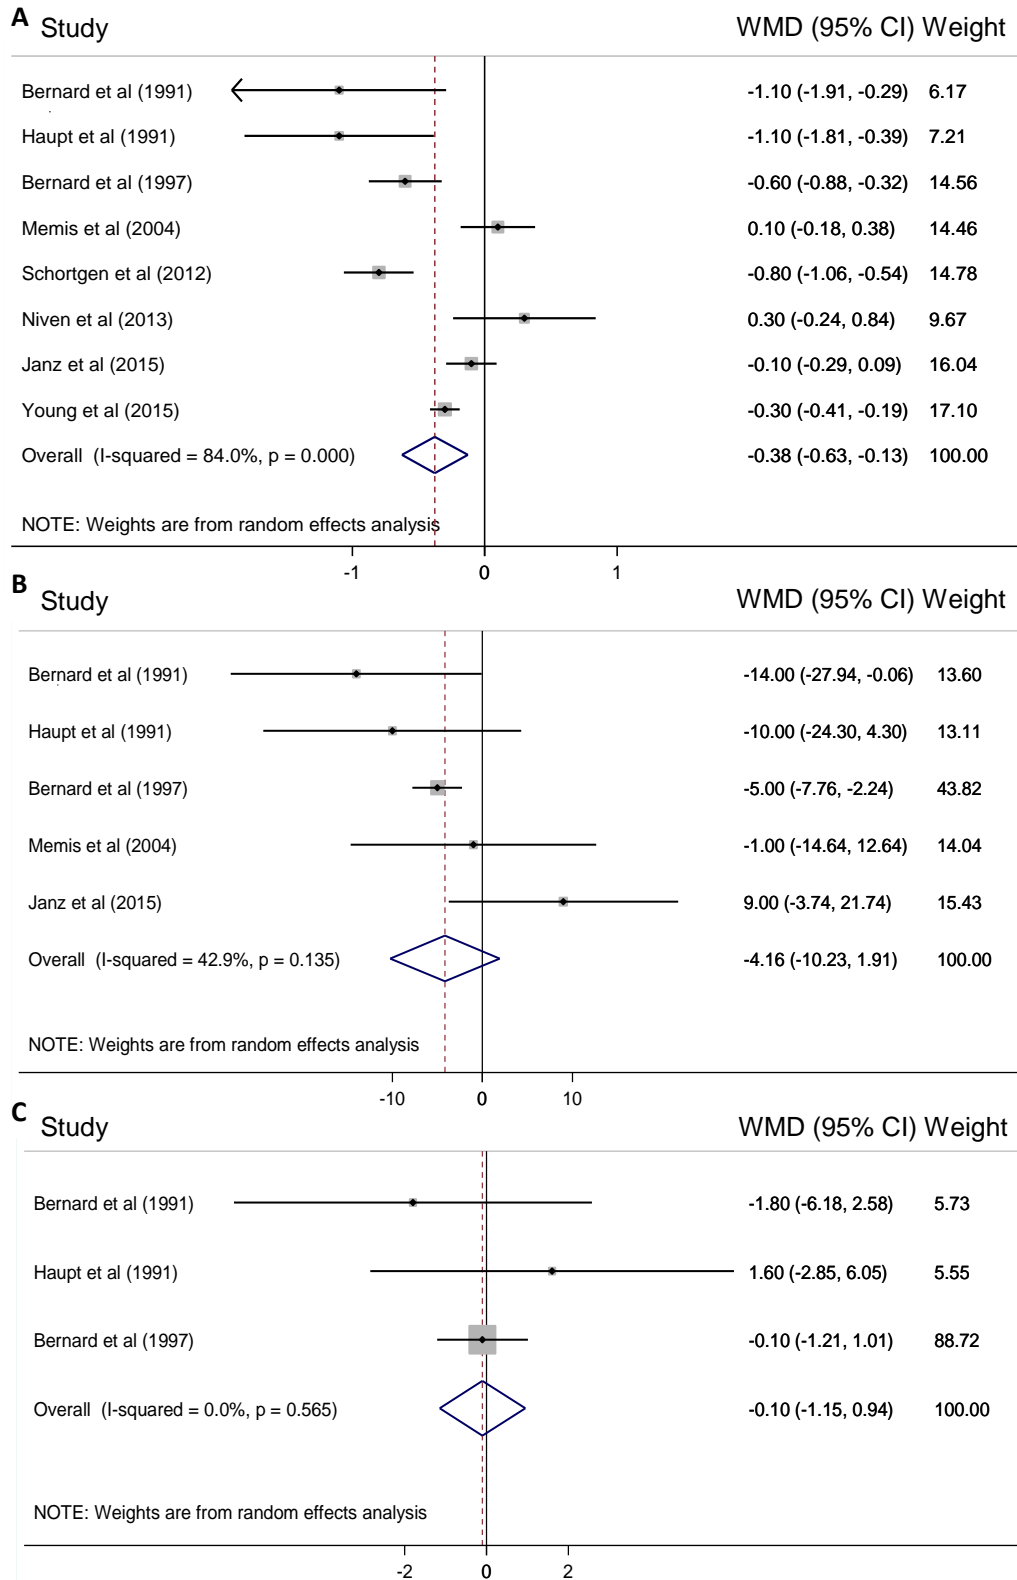

Meta-analysis results of (A) post-intervention body temperature, (B) post-intervention heart rate, and (C) post-intervention minute ventilation. Results reported as weighted mean differences (WMD) between the antipyretic and control groups expressed in (A) °C, (B) beats per minute, or (C) L/min. The size of the grey box corresponds to weight in the random effects analysis. A WMD < 0 indicates a decrease in the parameter. WMD, weighted mean difference; 95% CI, 95% confidence interval.

**Supplemental Figure 4. Funnel plots of 28-day/Hospital Mortality in Randomized and Observational Studies Comparing Antipyretic Therapy to Control**

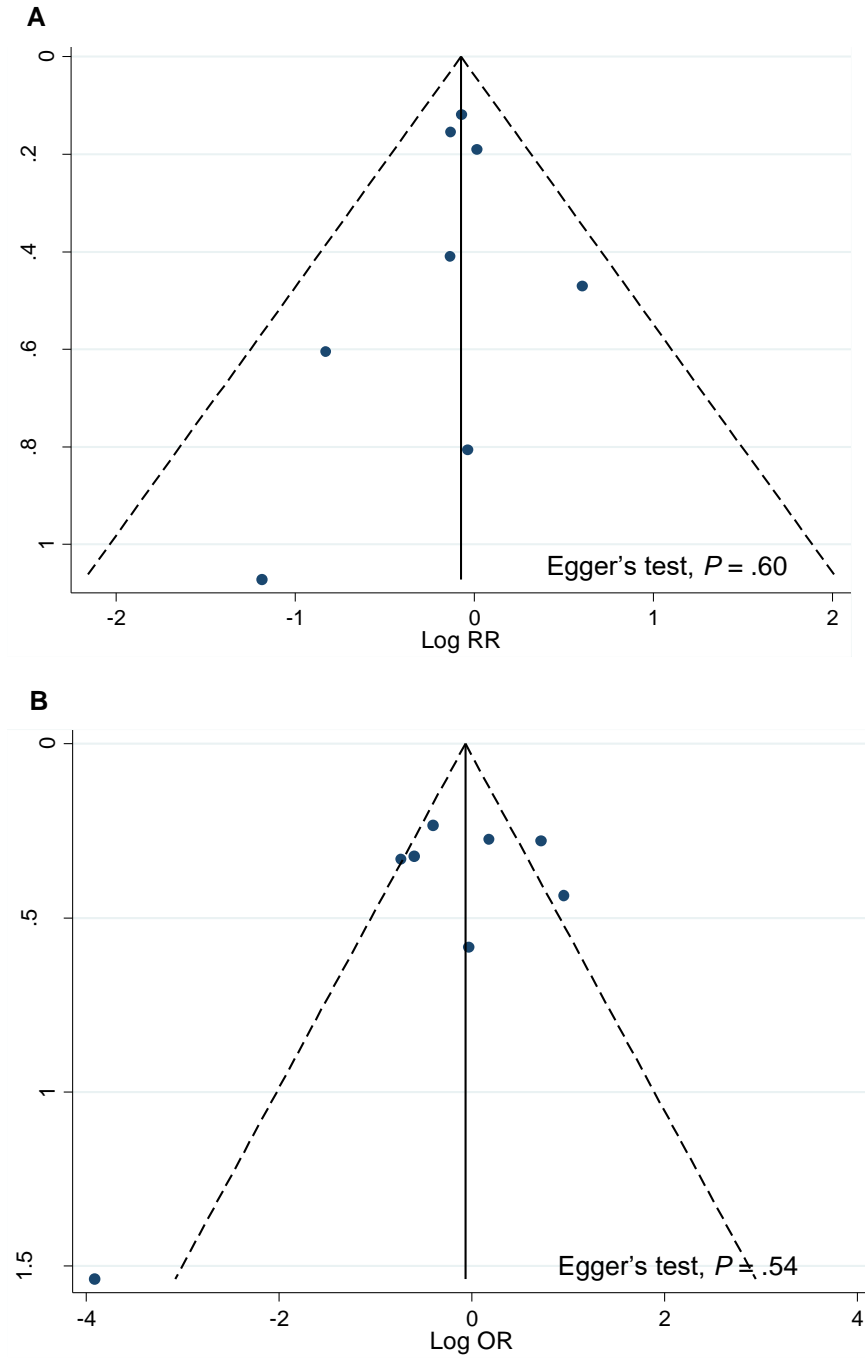

Funnel plots demonstrating effect sizes and standard errors of effect sizes for 28-day/hospital mortality as reported in the included (A) randomized and (B) observational studies. RR, relative risk; OR, odds ratio.

### Supplemental Figure 5. Simulation-Based Power Curve for 28-day/Hospital Mortality

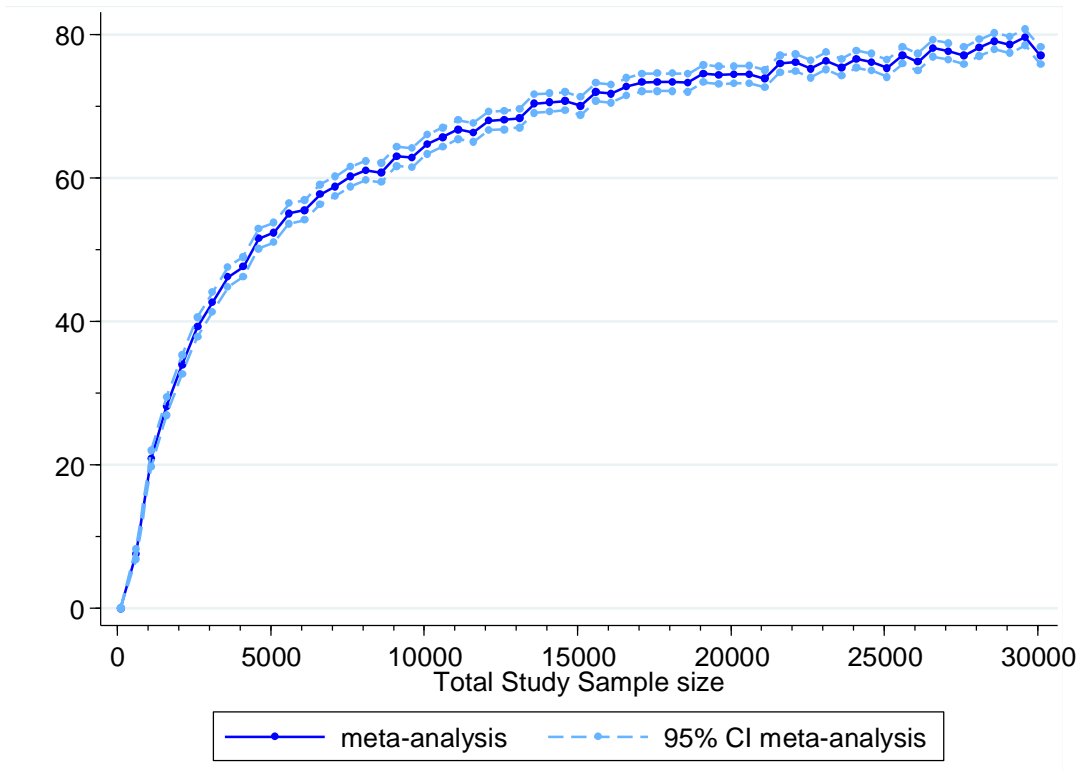

Power curve for 28-day/hospital mortality based on relative risk using a fixed-effects model. It demonstrates the total sample sizes required of an additional study to achieve varying levels of power to change the results of the meta-analysis to favor antipyretic therapy. An additional study would need to enroll approximately 29,000 patients to achieve a power of 80%.

**Supplemental Table 6. Patient Baseline Characteristics of the Observational Studies<sup>a</sup>**

| Author (year)                | N <sup>b</sup>     | Male, No. (%)           | Age <sup>c</sup> (years) | Fever, No. (%)         | Fever definition <sup>d</sup> (C°) | Illness severity scores <sup>c</sup>                            | Mechanical ventilation, No. (%) | Vasopressors, No. (%) |
|------------------------------|--------------------|-------------------------|--------------------------|------------------------|------------------------------------|-----------------------------------------------------------------|---------------------------------|-----------------------|
| Pestaña et al (50) (2007)    | 30                 | 21 (70)                 | 61 (14)                  | 30 (100)               | ≥ 39.5                             | APACHE II: 21 (5)<br>SOFA: 10 (2)                               | 30 (100)                        | 30 (100)              |
| Selladurai et al (51) (2011) | 106                | 63 (59)                 | 64 (16)                  | 36 (34)                | ≥ 38.1                             | APACHE III: 59 (48-74)                                          | 47 (44)                         | -                     |
| Lee et al (52) (2012)        | 606                | 385 (64)                | 67 (55-75)               | 267 (44)               | ≥ 38.5                             | APACHE II: 21 (16-25)                                           | 429 (71)                        | -                     |
| Mohr et al (53) (2012)       | 171                | -                       | -                        | 171 (100)              | -                                  | -                                                               | -                               | -                     |
| Mohr et al (54) (2012)       | 278                | 145 (52)                | 58 (16)                  | 278 (100)              | ≥ 38.3                             | APACHE II: 24 (7)                                               | 122 (44)                        | 116 (42)              |
| Janz et al (55) (2013)       | 292                | 155 (53)                | 58 (49-68)               | -                      | -                                  | APACHE II: 28 (21-33)                                           | -                               | -                     |
| Zhang et al (56) (2015)      | 15268              | 8175 (54)               | 65 (20)                  | 11433 (75)             | ≥ 37.3                             | SAPS: 15 (5)<br>SOFA: 6 (4)                                     | -                               | -                     |
| Suzuki et al (57) (2015)     | 15818 <sup>e</sup> | 10199 (64) <sup>e</sup> | 64 (51-73) <sup>e</sup>  | 4397 (28) <sup>e</sup> | ≥ 38.1                             | APACHE II: 17 (7) <sup>e</sup><br>SAPS II: 30 (22) <sup>e</sup> | 11513 (73) <sup>e</sup>         | -                     |

Dashes indicate information not provided. <sup>a</sup>For studies in which only a subset of patients was included in the analysis of the relationship between antipyretic therapy and mortality in septic patients, baseline characteristics are provided for that subset, unless otherwise noted. <sup>b</sup>Number of patients included in analysis of baseline characteristics. <sup>c</sup>Continuous variables reported as mean (standard deviation) or median (interquartile range). <sup>d</sup>Body temperature threshold used to stratify patients into febrile and afebrile groups. <sup>e</sup>Baseline characteristics reported for entire study population, not for subset of infected patients (n = 681) included in the analysis of the relationship between antipyretic therapy and mortality. APACHE, Acute Physiology and Chronic Health Evaluation; SOFA, sequential organ failure assessment; SAPS, Simplified Acute Physiology Score.

**Supplemental Table 7. Methodological Quality Assessment of Observational Studies Using the Newcastle-Ottawa Scale**

| Author (year)                | Patient Selection <sup>a</sup> | Comparability <sup>b</sup> | Outcome/Exposure <sup>c</sup> | Total |
|------------------------------|--------------------------------|----------------------------|-------------------------------|-------|
| Pestaña et al (50) (2007)    | ★ ★ ★                          | ★                          | ★ ★ ★                         | 7     |
| Selladurai et al (51) (2011) | ★ ★ ★ ★                        |                            | ★ ★ ★                         | 7     |
| Lee et al (52) (2012)        | ★ ★ ★ ★                        | ★ ★                        | ★ ★ ★                         | 9     |
| Mohr et al (53) (2012)       | ★ ★ ★ ★                        | ★                          | ★ ★ ★                         | 8     |
| Mohr et al (54) (2012)       | ★ ★ ★ ★                        | ★                          | ★ ★ ★                         | 8     |
| Janz et al (55) (2013)       | ★ ★ ★                          | ★ ★                        | ★ ★ ★                         | 8     |
| Zhang et al (56) (2015)      | ★ ★ ★                          | ★ ★                        | ★ ★ ★                         | 8     |
| Suzuki et al (57) (2015)     | ★ ★ ★ ★                        | ★ ★                        | ★ ★ ★                         | 9     |

Points represented by stars. <sup>a</sup>For case-control studies, evaluates adequacy of case and control definitions, representativeness of the cases, and selection of controls; for cohort studies, evaluates representativeness of exposed cohort, selection of the non-exposed cohort, ascertainment of exposure, and demonstration that the outcome of interest was not present at the start of the study; maximum four points. <sup>b</sup>Evaluates comparability of cases and controls or exposed and non-exposed cohorts; maximum two points. <sup>c</sup>For case-control studies, evaluates ascertainment of exposure, method of ascertainment for cases and controls, and non-response rate; for cohort studies, evaluates method of outcome assessment, length of follow-up, and adequacy of follow-up; maximum three points.

**Supplemental Table 8. Outcome Data for Observational Studies**

| Author (year)                | N <sup>a</sup>   | Antipyretic exposure, No. (%)                                           | Mortality reported           | Unadjusted OR (95% CI)                                                                               | Adjusted OR (95% CI)                                                                                | Variables included in multivariable model                                                                                                                                                                                    |
|------------------------------|------------------|-------------------------------------------------------------------------|------------------------------|------------------------------------------------------------------------------------------------------|-----------------------------------------------------------------------------------------------------|------------------------------------------------------------------------------------------------------------------------------------------------------------------------------------------------------------------------------|
| Pestaña et al (50) (2007)    | 30               | Physical cooling: 19 (63)                                               | 28-day mortality             | 0.02 (0.001, 0.41)                                                                                   | -                                                                                                   | -                                                                                                                                                                                                                            |
| Selladurai et al (51) (2011) | 106              | Acetaminophen: 74 (70)                                                  | ICU mortality                | 0.86 (0.15, 4.93)                                                                                    | -                                                                                                   | -                                                                                                                                                                                                                            |
| Lee et al (52) (2012)        | 606 <sup>b</sup> | Acetaminophen: 116 (19)<br>NSAIDs: 31 (5)<br>Physical cooling: 307 (51) | 28-day in-hospital mortality | Acetaminophen: 2.30 (1.48, 3.58)<br>NSAIDs: 2.32 (1.10, 4.91)<br>Physical cooling: 1.00 (0.68, 1.46) | Acetaminophen: 2.05 (1.19, 3.55)<br>NSAIDs: 2.61 (1.11, 6.11)<br>Physical cooling: 1.2 (0.70, 2.05) | Age, APACHE II score, perioperative admission, requirement for mechanical ventilation, cardiac or vascular disease, thoracic or respiratory disease, maximum body temperature during ICU stay, type of antipyretic treatment |
| Mohr et al (53) (2012)       | 171              | Antipyretic medication: 135 (79)                                        | 28-day in-hospital mortality | 0.40 (0.16, 1.01)                                                                                    | 0.97 (0.31, 3.06)                                                                                   | APACHE II score, intubation status, fever magnitude                                                                                                                                                                          |
| Mohr et al (54) (2012)       | 278              | Antipyretic medication: 130 (47)                                        | 28-day in-hospital mortality | 0.51 (0.30, 0.87)                                                                                    | 0.55 (0.29, 1.03)                                                                                   | APACHE II score, pneumonia, hypotension (per 10 mmHg), dialysis, surgery                                                                                                                                                     |
| Janz et al (55) (2013)       | 292 <sup>b</sup> | Acetaminophen: 146 (50)                                                 | Hospital mortality           | 0.42 (0.23, 0.78)                                                                                    | 0.48 (0.25, 0.92)                                                                                   | Age, presence of chronic liver disease, APACHE II score, cell-free hemoglobin concentration                                                                                                                                  |
| Zhang et al (56) (2015)      | 15268            | Antipyretic medication: 1027 (7)<br>Physical cooling: 1006 (7)          | ICU mortality                | Any antipyretic therapy: 1.60 (1.39, 1.83)<br>Physical cooling: 2.24 (1.91, 2.63)                    | Any antipyretic therapy: 1.36 (1.15, 1.59)<br>Physical cooling: 1.51 (1.23, 1.84)                   | Age, SOFA score, sex, ICU type, presence of elevated lactate, missing values, temperature load                                                                                                                               |
| Suzuki et al (57) (2015)     | 681 <sup>b</sup> | -                                                                       | Hospital mortality           | -                                                                                                    | 0.67 (0.42, 1.05)                                                                                   | APACHE II score, hospital, APACHE III diagnosis group, treatment limitation, propensity score for receiving paracetamol                                                                                                      |

Dashes indicate information not provided or not applicable. <sup>a</sup>Number of infected patients included in the analysis of the relationship between antipyretic therapy and mortality.

<sup>b</sup>Subgroup of patients included in meta-analysis. OR, odds ratio; 95% CI, 95% confidence interval; ICU, intensive care unit; NSAID, non-steroidal anti-inflammatory drug; APACHE, acute physiology and chronic health evaluation; SOFA, sequential organ failure assessment.



## References

1. Arons MM, Wheeler AP, Bernard GR, et al: Effects of ibuprofen on the physiology and survival of hypothermic sepsis. Ibuprofen in Sepsis Study Group. *Crit Care Med* 1999; 27:699-707.
2. Boyle M, Hundy S, Torda TA: Paracetamol administration is associated with hypotension in the critically ill. *Aust Crit Care* 1997; 10:120-122.
3. Boyle M, Nicholson L, O'Brien M, et al: Paracetamol induced skin blood flow and blood pressure changes in febrile intensive care patients: An observational study. *Aust Crit Care* 2011; 24:57.
4. Chandralekha, Gupta P, Trikha A: The north Indian dengue outbreak 2006: a retrospective analysis of intensive care unit admissions in a tertiary care hospital. *Trans R Soc Trop Med Hyg* 2008; 102:143-147.
5. Clemmer TP, Fisher CJ, Jr., Bone RC, et al: Hypothermia in the sepsis syndrome and clinical outcome. The Methylprednisolone Severe Sepsis Study Group. *Crit Care Med* 1992; 20:1395-1401.
6. Creechan T, Vollman K, Kravutske ME: Cooling by convection vs cooling by conduction for treatment of fever in critically ill adults. *Am J Crit Care* 2001; 10:52-59.
7. Cruz P, Garutti I, Diaz S, et al: [Metamizol versus propacetamol: comparative study of the hemodynamic and antipyretic effects in critically ill patients]. *Rev Esp Anestesiol Reanim* 2002; 49:391-396.
8. de Maat MM, Tijssen TA, Bruggemann RJ, et al: Paracetamol for intravenous use in medium- and intensive care patients: pharmacokinetics and tolerance. *Eur J Clin Pharmacol* 2010; 66:713-719.
9. Gozzoli V, Schottker P, Suter PM, et al: Is it worth treating fever in intensive care unit patients? Preliminary results from a randomized trial of the effect of external cooling. *Arch Intern Med* 2001; 161:121-123.
10. Gozzoli V, Treggiari MM, Kleger GR, et al: Randomized trial of the effect of antipyresis by metamizol, propacetamol or external cooling on metabolism, hemodynamics and inflammatory response. *Intensive Care Med* 2004; 30:401-407.
11. Greenberg RS, Chen H, Hasday JD: Acetaminophen has limited antipyretic activity in critically ill patients. *J Crit Care* 2010; 25:363 e361-367.
12. Hammond NE, Saxena MK, Taylor C, et al: Temperature management of patients with sepsis and inflammation in Australian and New Zealand ICUs: A point prevalence study. *Critical Care* 2011; 15:S8-S9.
13. Hammond NE, Saxena MK, Taylor C, et al: Temperature management of non-elective intensive care patients without neurological abnormalities: a point prevalence study of practice in Australia and New Zealand. *Crit Care Resusc* 2013; 15:228-233.
14. Henker R, Rogers S, Kramer DJ, et al: Comparison of fever treatments in the critically ill: a pilot study. *Am J Crit Care* 2001; 10:276-280.
15. Hersch M, Raveh D, Izbicki G: Effect of intravenous propacetamol on blood pressure in febrile critically ill patients. *Pharmacotherapy* 2008; 28:1205-1210.
16. Honarmand H, Abdollahi M, Ahmadi A, et al: Randomized trial of the effect of intravenous paracetamol on inflammatory biomarkers and outcome in febrile critically ill adults. *Daru* 2012; 20:12.
17. Kiekkas P, Brokalaki H, Manolis E, et al: Fever and standard monitoring parameters of ICU patients: a descriptive study. *Intensive Crit Care Nurs* 2007; 23:281-288.
18. Kiekkas P, Samios A, Skartsani C, et al: Fever and agitation in elderly ICU patients: a descriptive study. *Intensive Crit Care Nurs* 2010; 26:169-174.
19. Krajcova A, Matousek V, Duska F: Mechanism of paracetamol-induced hypotension in critically ill patients: a prospective observational cross-over study. *Aust Crit Care* 2013; 26:136-141.

20. Krudsood S, Tangpukdee N, Wilairatana P, et al: Intravenous ibuprofen (IV-ibuprofen) controls fever effectively in adults with acute uncomplicated Plasmodium falciparum malaria but prolongs parasitemia. *Am J Trop Med Hyg* 2010; 83:51-55.
21. Laupland KB, Zahar JR, Adrie C, et al: Determinants of temperature abnormalities and influence on outcome of critical illness. *Crit Care Med* 2012; 40:145-151.
22. Manthous CA, Hall JB, Olson D, et al: Effect of cooling on oxygen consumption in febrile critically ill patients. *Am J Respir Crit Care Med* 1995; 151:10-14.
23. Matsuda Y, Shichinohe Y, Omote T, et al: Effect of intravenous aspirin on hemodynamics in patients with sepsis. *Anest Resusc* 1995; 31:321-324.
24. Mohr N, Moy H, Alunday R, et al: The effect of antipyretic exposure on clinical outcomes in gram-negative sepsis. *Crit Care Med* 2010; 38:A117.
25. Mohr NM, Fuller BM, Skrupky LP, et al: Clinical and demographic factors associated with antipyretic use in gram-negative severe sepsis and septic shock. *Ann Pharmacother* 2011; 45:1207-1216.
26. Mohr NM, Fuller BM, Skrupky L, et al: Antipyretic use in gram-negative septic shock does not decrease the duration of vasopressor therapy. *Shock* 2013; 39:63-64.
27. Morris PE, Promes JT, Guntupalli KK, et al: A multi-center, randomized, double-blind, parallel, placebo-controlled trial to evaluate the efficacy, safety, and pharmacokinetics of intravenous ibuprofen for the treatment of fever in critically ill and non-critically ill adults. *Crit Care* 2010; 14:R125.
28. Mourvillier B, Tubach F, van de Beek D, et al: Induced hypothermia in severe bacterial meningitis: a randomized clinical trial. *JAMA* 2013; 310:2174-2183.
29. Niven DJ, Shahpori R, Stelfox HT, et al: Management of febrile critically ill adults: a retrospective assessment of regional practice. *Ther Hypothermia Temp Manag* 2011; 1:99-104.
30. Niven DJ, Stelfox HT, Kubes P, et al: Assessment of the safety and feasibility of administering anti-pyretic therapy in critically ill adults: A randomized clinical trial. *Intensive Care Med* 2012; 38:S245-S246.
31. Niven DJ, Jenne C, Kubes P, et al: The effects of anti-pyretic therapy on the immunology of fever in critically ill adults: Secondary analysis from a randomized clinical trial. *Intensive Care Med* 2012; 38:S246.
32. O'Donnell J, Axelrod P, Fisher C, et al: Use and effectiveness of hypothermia blankets for febrile patients in the intensive care unit. *Clin Infect Dis* 1997; 24:1208-1213.
33. Pernerstorfer T, Krafft P, Fitzgerald R, et al: Optimal values for oxygen transport during hypothermia in sepsis and ARDS. *Acta Anaesthesiol Scand Suppl* 1995; 107:223-227.
34. Pernerstorfer T, Schmid R, Bieglmayer C, et al: Acetaminophen has greater antipyretic efficacy than aspirin in endotoxemia: a randomized, double-blind, placebo-controlled trial. *Clin Pharmacol Ther* 1999; 66:51-57.
35. Poblete B, Romand JA, Pichard C, et al: Metabolic effects of i.v. propacetamol, metamizol or external cooling in critically ill febrile sedated patients. *Br J Anaesth* 1997; 78:123-127.
36. Promes JT, Safcsak K, Pavliv L, et al: A prospective, multicenter, randomized, double-blind trial of IV ibuprofen for treatment of fever and pain in burn patients. *J Burn Care Res* 2011; 32:79-90.
37. Rokyta R, Jr., Matejovic M, Krouzecky A, et al: Effects of continuous venovenous haemofiltration-induced cooling on global haemodynamics, splanchnic oxygen and energy balance in critically ill patients. *Nephrol Dial Transplant* 2004; 19:623-630.
38. Satsuta S: What is the role of ibuprofen in the decreasing of mortality and increasing survival of patients with severe sepsis? *Intensive Care Med* 2013; 39:S519-S520.
39. Schulman CI, Namias N, Doherty J, et al: The effect of antipyretic therapy upon outcomes in critically ill patients: a randomized, prospective study. *Surg Infect (Larchmt)* 2005; 6:369-375.
40. Young P, Saxena M, Eastwood GM, et al: Fever and fever management among intensive care patients with known or suspected infection: a multicentre prospective cohort study. *Crit Care Resusc* 2011; 13:97-102.

41. Yang YL, Liu DW, Wang XT, et al: Body temperature control in patients with refractory septic shock: too much may be harmful. *Chin Med J (Engl)* 2013; 126:1809-1813.
42. Bernard GR, Reines HD, Halushka PV, et al: Prostacyclin and thromboxane A2 formation is increased in human sepsis syndrome. Effects of cyclooxygenase inhibition. *Am Rev Respir Dis* 1991; 144:1095-1101.
43. Haupt MT, Jastremski MS, Clemmer TP, et al: Effect of ibuprofen in patients with severe sepsis: a randomized, double-blind, multicenter study. The Ibuprofen Study Group. *Crit Care Med* 1991; 19:1339-1347.
44. Bernard GR, Wheeler AP, Russell JA, et al: The effects of ibuprofen on the physiology and survival of patients with sepsis. The Ibuprofen in Sepsis Study Group. *N Engl J Med* 1997; 336:912-918.
45. Memis D, Karamanlioglu B, Turan A, et al: Effects of lornoxicam on the physiology of severe sepsis. *Crit Care* 2004; 8:R474-482.
46. Schortgen F, Clabault K, Katsahian S, et al: Fever control using external cooling in septic shock: a randomized controlled trial. *Am J Respir Crit Care Med* 2012; 185:1088-1095.
47. Niven DJ, Stelfox HT, Leger C, et al: Assessment of the safety and feasibility of administering antipyretic therapy in critically ill adults: a pilot randomized clinical trial. *J Crit Care* 2013; 28:296-302.
48. Janz DR, Bastarache JA, Rice TW, et al: Randomized, placebo-controlled trial of acetaminophen for the reduction of oxidative injury in severe sepsis: the Acetaminophen for the Reduction of Oxidative Injury in Severe Sepsis trial. *Crit Care Med* 2015; 43:534-541.
49. Young P, Saxena M, Bellomo R, et al: Acetaminophen for Fever in Critically Ill Patients with Suspected Infection. *N Engl J Med* 2015; 373:2215-2224.
50. Pestana D, Casanova E, Villagran MJ, et al: Continuous hemofiltration in hyperthermic septic shock patients. *J Trauma* 2007; 63:751-756.
51. Selladurai S, Eastwood GM, Bailey M, et al: Paracetamol therapy for septic critically ill patients: a retrospective observational study. *Crit Care Resusc* 2011; 13:181-186.
52. Lee BH, Inui D, Suh GY, et al: Association of body temperature and antipyretic treatments with mortality of critically ill patients with and without sepsis: multi-centered prospective observational study. *Crit Care* 2012; 16:R33.
53. Mohr NM, Fuller BM, McCammon CA, et al: Antipyretic use does not increase mortality in emergency department patients with severe sepsis. *Acad Emerg Med* 2012; 19:S161-S162.
54. Mohr N, Skrupky L, Fuller B, et al: Early antipyretic exposure does not increase mortality in patients with gram-negative severe sepsis: a retrospective cohort study. *Intern Emerg Med* 2012; 7:463-470.
55. Janz DR, Bastarache JA, Peterson JF, et al: Association between cell-free hemoglobin, acetaminophen, and mortality in patients with sepsis: an observational study. *Crit Care Med* 2013; 41:784-790.
56. Zhang Z, Chen L, Ni H: Antipyretic therapy in critically ill patients with sepsis: an interaction with body temperature. *PLoS One* 2015; 10:e0121919.
57. Suzuki S, Eastwood GM, Bailey M, et al: Paracetamol therapy and outcome of critically ill patients: a multicenter retrospective observational study. *Crit Care* 2015; 19:162.
